# Supplementary material for: Personality traits are consistently associated with blood mitochondrial DNA copy number estimated from genome sequences in two genetic cohort studies
Source: eLife journal article supplement (doi:10.7554/elife.77806), 2022-11-07
Supplement: code1 [file elife-77806-code1-v1.zip]

```

#####
#Analysis script for mtDNAcn and personality association
#####

#####
# 1 Multiple linear regression of mtDNAcn on Personality
#####
# BLSA
#variables to be analysed
variables<- names(blsa_neopir_final_pts)[c(11,14,23:(ncol(blsa_neopir_final_pts)-9),78)]

w_wo_wbcp<-1:3 #analysis with and without wbc parameters as covariates

btotal <- NA
bse_total<-NA
for(analysis in w_wo_wbcp){
  count <- 1
  btemp <- matrix(nrow=length(variables), ncol=8, dimnames=list(variables,c("Trait", "Coefficient", "lowerCI", "upperCI", "t_value", "P_Value", "R_Squared", "n")))
  b_se<-matrix(nrow=length(variables), ncol=4, dimnames=list(variables,c("Trait", "Coefficient", "se", "std_coef")))

  for(trait in variables){
    ##get your IV - all the applicable trait data
    IV <- blsa_neopir_final_pts[[trait]][!is.na(blsa_neopir_final_pts[[trait]])]

    ##get your IV aka the mt copy number for each ID
    DV <- blsa_neopir_final_pts$ave_mt_copy_number_30k[is.na(blsa_neopir_final_pts[[trait]])]
    ##Standardize DV
    DV <- (DV-mean(DV))/sd(DV)
    ##get Age covariate
    CVAge <- blsa_neopir_final_pts$age[is.na(blsa_neopir_final_pts[[trait]])]
    ##get Sex covariate
    CVSex <- blsa_neopir_final_pts$sex[is.na(blsa_neopir_final_pts[[trait]])]
    ##linreg w covariates
    CVcov <- blsa_neopir_final_pts$auto_coverage_30k[is.na(blsa_neopir_final_pts[[trait]])]
    ##adjust for blood traits
    CVPNE <- blsa_neopir_final_pts$CLPERCENTNEUTROPHILS[is.na(blsa_neopir_final_pts[[trait]])]
    CVPLY <- blsa_neopir_final_pts$CLPERCENTLYMPHOCYTES[is.na(blsa_neopir_final_pts[[trait]])]
    CVPMD <- blsa_neopir_final_pts$CLPERCENTMONOCYTES[is.na(blsa_neopir_final_pts[[trait]])]
    CVPEO <- blsa_neopir_final_pts$CLPERCENTEOSINOPHILS[is.na(blsa_neopir_final_pts[[trait]])]
    CVWBC <- blsa_neopir_final_pts$CLWBC[is.na(blsa_neopir_final_pts[[trait]])]
    CVPBA <- blsa_neopir_final_pts$CLPERCENTBASOPHILS[is.na(blsa_neopir_final_pts[[trait]])]
    CVPLT <- blsa_neopir_final_pts$CLPLATELETS[is.na(blsa_neopir_final_pts[[trait]])]
    n <- length(IV)- sum(is.na(IV))

    if(analysis == 1){
      linreg<-lm(DV ~ IV)
      btemp[count,1]<- trait
      btemp[count,2:8]<-c(summary(linreg)$coef[2,"Estimate"], confint(linreg,'IV', level = 0.95)[,1], confint(linreg,'IV', level = 0.95)[,2], summary(linreg)$coef[2,"t
value"], summary(linreg)$coef[2,"Pr(>|t|)"], summary(linreg)$r.squared,n)
      b_se[count,1]<-trait
      b_se[count,2:4]<-c(summary(linreg)$coef[2,"Estimate"], summary(linreg)$coef[2,"Std. Error"],summary(linreg)$coef[2,"Estimate"]*sd(IV)/sd(DV))
    }
    else if(analysis == 2){
      if(trait=="age"){linreg <- lm(DV ~ IV + CVSex + CVcov)}
      else if(trait=="sex"){linreg <- lm(DV ~ IV + CVAge + CVcov )}
      else if(trait=="auto_coverage_30k"){linreg <- lm(DV ~ IV + CVAge + CVSex )}
      else{linreg <- lm(DV ~ IV + CVAge + CVSex + CVcov )}
      btemp[count,1]<- trait
      btemp[count,2:8]<-c(summary(linreg)$coef[2,"Estimate"], confint(linreg,'IV', level = 0.95)[,1], confint(linreg,'IV', level = 0.95)[,2], summary(linreg)$coef[2,"t
value"], summary(linreg)$coef[2,"Pr(>|t|)"], summary(linreg)$r.squared,n)
      b_se[count,1]<-trait
      b_se[count,2:4]<-c(summary(linreg)$coef[2,"Estimate"], summary(linreg)$coef[2,"Std. Error"],summary(linreg)$coef[2,"Estimate"]*sd(IV)/sd(DV))
    }
    else{
      if(trait=="age"){linreg <- lm(DV ~ IV + CVSex + CVcov + CVPNE + CVPLY + CVPMD + CVPEO + CVWBC+CVPBA+CVPLT)}
      else if(trait=="sex"){linreg <- lm(DV ~ IV + CVAge + CVcov + CVPNE + CVPLY + CVPMD + CVPEO + CVWBC+CVPBA+CVPLT)}
      else if(trait=="CLPERCENTNEUTROPHILS"){linreg <- lm(DV ~ IV + CVAge + CVSex + CVcov + CVPLY + CVPMD + CVPEO + CVWBC+CVPBA+CVPLT)}
      else if(trait=="CLPERCENTLYMPHOCYTES"){linreg <- lm(DV ~ IV + CVAge + CVSex + CVcov + CVPNE + CVPMD + CVPEO + CVWBC+CVPBA+CVPLT)}
      else if(trait=="CLPERCENTMONOCYTES"){linreg <- lm(DV ~ IV + CVAge + CVSex + CVcov + CVPNE + CVPLY + CVPEO + CVWBC+CVPBA+CVPLT)}
      else if(trait=="CLPERCENTEOSINOPHILS"){linreg <- lm(DV ~ IV + CVAge + CVSex + CVcov + CVPNE + CVPLY + CVPMD + CVWBC+CVPBA+CVPLT)}
      else if(trait=="CLPERCENTBASOPHILS"){linreg <- lm(DV ~ IV + CVAge + CVSex + CVcov + CVPNE + CVPLY + CVPMD + CVWBC+CVPBA+CVPLT)}
      else if(trait=="CLWBC"){linreg <- lm(DV ~ IV + CVAge + CVSex + CVcov + CVPNE + CVPLY + CVPMD + CVPEO+CVPBA+CVPLT)}
      else if(trait=="CLPLATELETS"){linreg <- lm(DV ~ IV + CVAge + CVSex + CVcov + CVPNE + CVPLY + CVPMD + CVPEO+CVPBA+CVWBC)}

      else{linreg <- lm(DV ~ IV + CVAge + CVSex + CVcov + CVPNE + CVPLY + CVPMD + CVPEO + CVWBC+CVPBA+CVPLT)}
      btemp[count,1]<- trait
      btemp[count,2:8]<-c(summary(linreg)$coef[2,"Estimate"], confint(linreg,'IV', level = 0.95)[,1], confint(linreg,'IV', level = 0.95)[,2], summary(linreg)$coef[2,"t
value"], summary(linreg)$coef[2,"Pr(>|t|)"], summary(linreg)$r.squared,n)
      b_se[count,1]<-trait
      b_se[count,2:4]<-c(summary(linreg)$coef[2,"Estimate"], summary(linreg)$coef[2,"Std. Error"],summary(linreg)$coef[2,"Estimate"]*sd(IV)/sd(DV))
    }
    count <- count+1
  }
  if(analysis==1){btemp1<-as.data.frame(btemp)}
  if(analysis==2){btemp2<-as.data.frame(btemp)}
  if(analysis==3){btemp3<-as.data.frame(btemp)}
  if(analysis==1){b_se1<-as.data.frame(b_se)}
  if(analysis==2){b_se2<-as.data.frame(b_se)}
  if(analysis==3){b_se3<-as.data.frame(b_se)}
  rm(btemp)
  rm(b_se)
}

btemp1[,6]<-as.numeric(as.character(btemp1[,6]))
btemp2[,6]<-as.numeric(as.character(btemp2[,6]))
btemp3[,6]<-as.numeric(as.character(btemp3[,6]))

```

```

btemp1 <- btemp1[order(btemp1[,6]),]
btemp2 <- btemp2[order(btemp2[,6]),]
btemp3 <- btemp3[order(btemp3[,6]),]

btotal<-cbind(btemp1,btemp2,btemp3)
write.csv(btotal, file="BLSA_final_analysis_results_mtdnacnstd.csv", row.names=F)
bse_total<-cbind(b_se1,b_se2,b_se3)
write.csv(bse_total, file="BLSA_final_analysis_se_mtdnacnstd.csv", row.names=F)

#-----
# Sardinia analysis
#-----
##pick traits to analyze
traits <- names(wavedata1_plt)[c(6:7,12:88,117)]
MinRealPoints <- 25 ##Amount of real points needed to be considered for being analyzed - can be made less stringent

stotal <- NA
std_total<-NA
for(analysis in w_wo_wbcp){
  count <- 1
  stemp <- matrix(nrow=length(traits), ncol=8, dimnames=list(traits, c("Trait", "Coefficient", "lowerCI", "upperCI", "t_value", "P_Value", "R_Squared", "n")))
  std_err<-matrix(nrow=length(traits), ncol=4, dimnames=list(traits, c("Trait", "Coefficient", "se", "std_coef_b")))
  for(trait in traits){
    ##get your IV - all the applicable trait data
    IV <- wavedata1_plt[[trait]][!is.na(wavedata1_plt[[trait]])]

    ##get your DV aka the mt copy number for each ID
    DV <- wavedata1_plt$MT_count[!is.na(wavedata1_plt[[trait]])]
    #standardise DV
    DV <- (DV-mean(DV))/sd(DV)
    ##get Age covariate
    CVAge <- wavedata1_plt$Age[!is.na(wavedata1_plt[[trait]])]
    ##get Sex covariate
    CVSex <- wavedata1_plt$Sex[!is.na(wavedata1_plt[[trait]])]
    ##linreg w covariats
    CVcov <- wavedata1_plt$Chrom_Coverage[!is.na(wavedata1_plt[[trait]])]
    ##adjust for blood traits
    CVPNE <- wavedata1_plt$labsPercNE[!is.na(wavedata1_plt[[trait]])]
    CVPLY <- wavedata1_plt$labsPercLY[!is.na(wavedata1_plt[[trait]])]
    CVPMD <- wavedata1_plt$labsPercMD[!is.na(wavedata1_plt[[trait]])]
    CVPEO <- wavedata1_plt$labsPercEO[!is.na(wavedata1_plt[[trait]])]
    CVPBA <- wavedata1_plt$labsPercBA[!is.na(wavedata1_plt[[trait]])]
    CVWBC <- wavedata1_plt$labsWBC[!is.na(wavedata1_plt[[trait]])]
    CVPLT <- wavedata1_plt$labsPLT[!is.na(wavedata1_plt[[trait]])]
    n <- length(IV)- sum(is.na(IV))
    if(MinRealPoints <= n){

      if(analysis == 1){
        linreg<-lm(DV ~ IV)
        stemp[count,1]<- trait

        stemp[count,2:8]<-c(summary(linreg)$coef[2,"Estimate"], confint(linreg, 'IV', level = 0.95)[,1], confint(linreg, 'IV', level = 0.95)[,2], summary(linreg)$coef[2,"t
value"], summary(linreg)$coef[2,"Pr(>|t|)"], summary(linreg)$r.squared, n)
        std_err[count,1]<-trait
        std_err[count,2:4]<-c(summary(linreg)$coef[2,"Estimate"], summary(linreg)$coef[2,"Std. Error"], summary(linreg)$coef[2,"Estimate"]*sd(IV)/sd(DV))
      }

      else if(analysis == 2){
        if(trait=="Age"){linreg <- lm(DV ~ IV + CVSex + CVcov)}
        else if(trait=="Sex"){linreg <- lm(DV ~ IV + CVAge + CVcov )}
        else if(trait=="Chrom_Coverage"){linreg <- lm(DV ~ IV + CVAge + CVSex )}
        else{linreg <- lm(DV ~ IV + CVAge + CVSex + CVcov )}
        stemp[count,1]<- trait
        stemp[count,2:8]<-c(summary(linreg)$coef[2,"Estimate"], confint(linreg, 'IV', level = 0.95)[,1], confint(linreg, 'IV', level = 0.95)[,2], summary(linreg)$coef[2,"t
value"], summary(linreg)$coef[2,"Pr(>|t|)"], summary(linreg)$r.squared, n)
        std_err[count,1]<-trait
        std_err[count,2:4]<-c(summary(linreg)$coef[2,"Estimate"], summary(linreg)$coef[2,"Std. Error"], summary(linreg)$coef[2,"Estimate"]*sd(IV)/sd(DV))
      }

      else {
        if(trait=="Age"){linreg <- lm(DV ~ IV + CVSex + CVcov + CVPNE + CVPLY + CVPMD + CVPEO + CVPBA + CVWBC+CVPLT)}
        else if(trait=="Sex"){linreg <- lm(DV ~ IV + CVAge + CVcov + CVPNE + CVPLY + CVPMD + CVPEO + CVPBA + CVWBC+CVPLT)}
        else if(trait=="labsPercNE"){linreg <- lm(DV ~ IV + CVAge + CVSex + CVcov + CVPLY + CVPMD + CVPEO + CVPBA + CVWBC+CVPLT)}
        else if(trait=="labsPercLY"){linreg <- lm(DV ~ IV + CVAge + CVSex + CVcov + CVPNE + CVPMD + CVPEO + CVPBA + CVWBC+CVPLT)}
        else if(trait=="labsPercMD"){linreg <- lm(DV ~ IV + CVAge + CVSex + CVcov + CVPNE + CVPLY + CVPMD + CVPEO + CVPBA + CVWBC+CVPLT)}
        else if(trait=="labsPercEO"){linreg <- lm(DV ~ IV + CVAge + CVSex + CVcov + CVPNE + CVPLY + CVPMD + CVPEO + CVPBA + CVWBC+CVPLT)}
        else if(trait=="labsPercBA"){linreg <- lm(DV ~ IV + CVAge + CVSex + CVcov + CVPNE + CVPLY + CVPMD + CVPEO + CVPBA + CVWBC+CVPLT)}
        else if(trait=="labsWBC"){linreg <- lm(DV ~ IV + CVAge + CVSex + CVcov + CVPNE + CVPLY + CVPMD + CVPEO + CVPBA + CVPLT)}
        else if(trait=="labsPLT"){linreg <- lm(DV ~ IV + CVAge + CVSex + CVcov + CVPNE + CVPLY + CVPMD + CVPEO + CVPBA+CVWBC)}

        else{linreg <- lm(DV ~ IV + CVAge + CVSex + CVcov + CVPNE + CVPLY + CVPMD + CVPEO + CVPBA + CVWBC+CVPLT)}

        stemp[count,1]<- trait
        stemp[count,2:8]<-c(summary(linreg)$coef[2,"Estimate"], confint(linreg, 'IV', level = 0.95)[,1], confint(linreg, 'IV', level = 0.95)[,2], summary(linreg)$coef[2,"t
value"], summary(linreg)$coef[2,"Pr(>|t|)"], summary(linreg)$r.squared, n)
        std_err[count,1]<-trait
        std_err[count,2:4]<-c(summary(linreg)$coef[2,"Estimate"], summary(linreg)$coef[2,"Std. Error"], summary(linreg)$coef[2,"Estimate"]*sd(IV)/sd(DV))
      }
    }
    else{
      stemp[count,]<-NA
      std_err[count,]<-NA
    }
  }
  count <- count+1
}

if(analysis==1){stemp1<-as.data.frame(stemp)}
if(analysis==2){stemp2<-as.data.frame(stemp)}
if(analysis==3){stemp3<-as.data.frame(stemp)}
if(analysis==1){std_err1<-as.data.frame(std_err)}

```

```

if (analysis==2){std_err2<-as.data.frame(std_err)}
if (analysis==3){std_err3<-as.data.frame(std_err)}

rm(stemp)
rm(std_err)
}
stemp1[,6]<-as.numeric(as.character(stemp1[,6]))
stemp2[,6]<-as.numeric(as.character(stemp2[,6]))
stemp3[,6]<-as.numeric(as.character(stemp3[,6]))

stemp1 <- stemp1[order(stemp1[,6]),]
stemp2 <- stemp2[order(stemp2[,6]),]
stemp3 <- stemp3[order(stemp3[,6]),]
stotal<-cbind(stemp1,stemp2,stemp3)
write.csv(stotal, file="Sardinia_final_analysis_results_mtdnacnstd.csv", row.names=F)
std_total<-cbind(std_err1,std_err2,std_err3)
write.csv(std_total, file="Sardinia_final_analysis_se_mtdnacnstd.csv", row.names=F)

#####
# 2 Linear Regression of mtDNAcn on CES-D (measure of depressive symptoms)
#####

### BLSA #####
#standardize variables
blsa_mtdna_cesd_plt$ave_mt_copy_number_30k_std<-(blsa_mtdna_cesd_plt$ave_mt_copy_number_30k-mean(blsa_mtdna_cesd_plt$ave_mt_copy_number_30k))/
sd(blsa_mtdna_cesd_plt$ave_mt_copy_number_30k)

blsa_mtdna_cesd_plt$CEScut16<-as.factor(blsa_mtdna_cesd_plt$CEScut16)
blsa_mtdna_cesd_plt$CEScut20<-as.factor(blsa_mtdna_cesd_plt$CEScut20)
fitcesd<-lm(ave_mt_copy_number_30k_std~age+sex+auto_coverage_30k+CEScut16,data = blsa_mtdna_cesd_plt)
fitcesd16<-lm(ave_mt_copy_number_30k_std~CEScut16,data = blsa_mtdna_cesd_plt)
fitcesd20<-lm(ave_mt_copy_number_30k_std~CEScut20,data = blsa_mtdna_cesd_plt)

## Adjusted for age, sex and coverage
fitcesd<-lm(ave_mt_copy_number_30k_std~age+sex+auto_coverage_30k+CESD,data = blsa_mtdna_cesd_plt)
fitcesd16<-lm(ave_mt_copy_number_30k_std~age+sex+auto_coverage_30k+CEScut16,data = blsa_mtdna_cesd_plt)
fitcesd20<-lm(ave_mt_copy_number_30k_std~age+sex+auto_coverage_30k+CEScut20,data = blsa_mtdna_cesd_plt)

# adjusting for age sex coverage and wbc parameters
fitcesd<-lm(ave_mt_copy_number_30k_std~age+sex+
auto_coverage_30k+CLWBC+CLPERCENTLYMPHOCYTES+CLPERCENTEOSINOPHILS+
CLPERCENTMONOCYTES+CLPERCENTNEUTROPHILS+CLPERCENTBASOPHILS+CLPLATELETS+CESD,data = blsa_mtdna_cesd_plt)
fitcesd16<-lm(ave_mt_copy_number_30k_std~age+sex+
auto_coverage_30k+CLWBC+CLPERCENTLYMPHOCYTES+CLPERCENTEOSINOPHILS+
CLPERCENTMONOCYTES+CLPERCENTNEUTROPHILS+CLPERCENTBASOPHILS+CLPLATELETS+CEScut16,data = blsa_mtdna_cesd_plt)
fitcesd20<-lm(ave_mt_copy_number_30k_std~age+sex+
auto_coverage_30k+CLWBC+CLPERCENTLYMPHOCYTES+CLPERCENTEOSINOPHILS+
CLPERCENTMONOCYTES+CLPERCENTNEUTROPHILS+CLPERCENTBASOPHILS+CLPLATELETS+CEScut20,data = blsa_mtdna_cesd_plt)

#####SardinIA#####
#standardize variables
wavedata3_plt$MT_count_std<-(wavedata3_plt$MT_count-mean(wavedata3_plt$MT_count,na.rm = T))/sd(wavedata3_plt$MT_count,na.rm = T)
fitcesd<-lm(MT_count_std~CESD,data = wavedata3_plt)
fitcesd16<-lm(MT_count_std~CESDcut16,data = wavedata3_plt)
fitcesd20<-lm(MT_count_std~CESDcut20,data = wavedata3_plt)

## Adjusted for age, sex and coverage
fitcesd<-lm(MT_count_std~Age+Sex+Chrom_Coverage+CESD,data = wavedata3_plt)
wavedata3_plt$CESDcut16<-as.factor(wavedata3_plt$CESDcut16)
wavedata3_plt$CESDcut20<-as.factor(wavedata3_plt$CESDcut20)
fitcesd16<-lm(MT_count_std~Age+Sex+Chrom_Coverage+CESDcut16,data = wavedata3_plt)
fitcesd20<-lm(MT_count_std~Age+Sex+Chrom_Coverage+CESDcut20,data = wavedata3_plt)

# adjusting for age sex coverage and wbc parameters
fitcesd<-lm(MT_count_std~Age+Chrom_Coverage+labsWBC+labsPercNE+labsPercEO+
labsPercLY+labsPercMO+Sex+ labsPLT+CESD,data = wavedata3_plt)
fitcesd16<-lm(MT_count_std~Age+Chrom_Coverage+labsWBC+labsPercNE+
labsPercEO+labsPercLY+labsPercMO+Sex+labsPLT+CESDcut16,data = wavedata3_plt)
fitcesd20<-lm(MT_count_std~Age+Chrom_Coverage+labsWBC+labsPercNE+
labsPercEO+labsPercLY+labsPercMO+Sex+ labsPLT+CESDcut20,data = wavedata3_plt)

#####
# 3 Personality mortality Index
#####
## Vulnerability, Activity, Competence and Self discipline facets
##We propose that we could use a list of traits that are associated with mortality risk
##in Chapman et al. 2020 and assign a score of 0 or 1 to each individual based on the median value
##and the direction of the association of the trait. Then we can get a composite score for each
##individual by summing up the individual trait scores (creating an index)

=====BLSA=====
median(blsa_neopir_final_pts$neotn6,na.rm = T) #median of vulnerability 46.15385
median(blsa_neopir_final_pts$neotc5,na.rm = T) #median of self discipline 50.07752
median(blsa_neopir_final_pts$neote4,na.rm = T) #median of activity 51.32231
median(blsa_neopir_final_pts$neotc1,na.rm = T) #median of competence 54.73469

# create column of 4 distinct personality types
blsa_neopir_final_pts$vuv<-NA #vulnerability
#high vulnerability is 0
blsa_neopir_final_pts$vuv[which(blsa_neopir_final_pts$neotn6<46.15385)]<-0
blsa_neopir_final_pts$vuv[which(blsa_neopir_final_pts$neotn6<=46.15385)]<-1

blsa_neopir_final_pts$sd<-NA #self discipline
#high self discipline is 1
blsa_neopir_final_pts$sd[which(blsa_neopir_final_pts$neotc5>50.07752)]<-1

```

```

blsa_neopir_final_pts$sd[which(blsa_neopir_final_pts$neotc5<=50.07752)]<-0

blsa_neopir_final_pts$sac<-NA #activity
#high activity is 1
blsa_neopir_final_pts$sac[which(blsa_neopir_final_pts$neote4>51.32231)]<-1
blsa_neopir_final_pts$sac[which(blsa_neopir_final_pts$neote4<=51.32231)]<-0

blsa_neopir_final_pts$co<-NA #competence
#high competence is 1
blsa_neopir_final_pts$co[which(blsa_neopir_final_pts$neotc1>54.73469)]<-1
blsa_neopir_final_pts$co[which(blsa_neopir_final_pts$neotc1<=54.73469)]<-0

#Summing to create Composite trait
blsa_neopir_final_pts$mort_comp<-blsa_neopir_final_pts$vu +blsa_neopir_final_pts$sd + blsa_neopir_final_pts$sac +blsa_neopir_final_pts$co

#box plots
library(dplyr)
library(ggplot2)
library(grid)
library(gridExtra)
library(ggpubr)

blsa_neopir_final_pts$mort_comp<-factor(blsa_neopir_final_pts$mort_comp, levels = sort(unique(blsa_neopir_final_pts$mort_comp)))
my_comp_m<-list(c('0','1'),c('0','2'),c('0','3'),c('0','4'))

mort_plot<-ggboxplot(data=subset(blsa_neopir_final_pts, is.na(mort_comp)), x='mort_comp', y='std_mtdnacn', color='mort_comp', palette = 'jco', add = 'jitter', legend='none')
mort_plot<-mort_plot+ggtitle('A
                                \n ')
mort_plot<-mort_plot+annotate('text', x=4, y=5, label='p-value < 0.005', fontface=2)#+stat_compare_means(method = 'anova', label.y =
3.5)+stat_compare_means(comparisons=my_comp_m, method = 't.test', label= 'p.format')#, label.y = 420)
mort_plot<-mort_plot+my_own_theme()+theme(legend.position='none', panel.grid = element_blank())+xlab('Personality-Mortality Indices')+ylab('Standardized mtDNA copy
number')
mort_plot
ggsave(mort_plot, file="Pers_mort_BLSA_Final_std.jpeg", width=7, height=7)

# t test of the composite groups
t.test(blsa_neopir_final_pts$std_mtdnacn[which(blsa_neopir_final_pts$mort_comp==0)], blsa_neopir_final_pts$std_mtdnacn[which(blsa_neopir_final_pts$mort_comp==1)])
t.test(blsa_neopir_final_pts$std_mtdnacn[which(blsa_neopir_final_pts$mort_comp==0)], blsa_neopir_final_pts$std_mtdnacn[which(blsa_neopir_final_pts$mort_comp==2)])
t.test(blsa_neopir_final_pts$std_mtdnacn[which(blsa_neopir_final_pts$mort_comp==0)], blsa_neopir_final_pts$std_mtdnacn[which(blsa_neopir_final_pts$mort_comp==3)])
t.test(blsa_neopir_final_pts$std_mtdnacn[which(blsa_neopir_final_pts$mort_comp==0)], blsa_neopir_final_pts$std_mtdnacn[which(blsa_neopir_final_pts$mort_comp==4)])

# effect on life
#with adjustments
summary(lm(age~wo_age_resid_std, data=blsa_neopir_final_pts))

#for vu_sd

blsa_neopir_final_pts$vu_sd<-factor(blsa_neopir_final_pts$vu_sd, levels = sort(unique(blsa_neopir_final_pts$vu_sd)))
my_comp<-list(c('LVHD', 'HVLD'), c('HVLD', 'HVHD'), c('HVLD', 'LVLD'))

vusd_plot<-ggboxplot(data=subset(blsa_neopir_final_pts, is.na(vu_sd)), x='vu_sd', y='std_mtdnacn', color='vu_sd', palette = 'jco', add = 'jitter', legend='none')
vusd_plot<-vusd_plot+ggtitle('A
                                \n ')
vusd_plot<-vusd_plot+stat_compare_means(method = 'anova', label.y = 6)+stat_compare_means(comparisons=my_comp, method = 't.test', label= 'p.format')#, label.y = 420)
vusd_plot<-vusd_plot+my_own_theme()+theme(legend.position='none', panel.grid = element_blank())+xlab('Vulnerability and Self-discipline classes')+ylab('Standardized mtDNA
copy number')
vusd_plot
ggsave(vusd_plot, file="VDMort_BLSA_Final_std.jpeg", width=6, height=6)

# t test of highest and lowest mortality risk groups (HVLD and LVHD)
t.test(blsa_neopir_final_pts$std_mtdnacn[which(blsa_neopir_final_pts$vu_sd=="HVLD")], blsa_neopir_final_pts$std_mtdnacn[which(blsa_neopir_final_pts$vu_sd=="LVHD")])

#### SardinIA ####
sard_morts_original<-sard_morts #created December 28 2020
sard_morts<-all_traits_unrelated[which(all_traits_unrelated$Wave==1),
                                c('id_individual', 'MT_count', 'neotn6', 'neotc5', 'neote4', 'neotc1')]
median(sard_morts$neotn6, na.rm = T) #median of vulnerability 55.12821
median(sard_morts$neotc5, na.rm = T) #median of self discipline 50.46512
median(sard_morts$neote4, na.rm = T) #median of activity 50.90909
median(sard_morts$neotc1, na.rm = T) #median of competence 43.71429

# create column of 4 distinct personality types
sard_morts$vu<-NA #vulnerability
#high vulnerability is 0
sard_morts$vu[which(sard_morts$neotn6>55.12821)]<-0
sard_morts$vu[which(sard_morts$neotn6<=55.12821)]<-1

sard_morts$sd<-NA #self discipline
#high self discipline is 1
sard_morts$sd[which(sard_morts$neotc5>50.46512)]<-1
sard_morts$sd[which(sard_morts$neotc5<=50.46512)]<-0

sard_morts$sac<-NA #activity
#high activity is 1
sard_morts$sac[which(sard_morts$neote4>50.90909)]<-1
sard_morts$sac[which(sard_morts$neote4<=50.90909)]<-0

sard_morts$co<-NA #competence
#high competence is 1
sard_morts$co[which(sard_morts$neotc1>43.71429)]<-1
sard_morts$co[which(sard_morts$neotc1<=43.71429)]<-0

#Summing to create Composite trait
sard_morts$mort_comp<-sard_morts$vu +sard_morts$sd + sard_morts$sac +sard_morts$co
sard_morts$std_MT_count<-(sard_morts$MT_count-mean(sard_morts$MT_count, na.rm = T))/sd(sard_morts$MT_count, na.rm = T)

#Plot
sard_morts$mort_comp<-factor(sard_morts$mort_comp, levels = sort(unique(sard_morts$mort_comp)))
my_comp_m<-list(c('0','1'),c('0','2'),c('0','3'),c('0','4'))

```

```

mort_plot<-ggboxplot(data=subset(sard_morts, !is.na(mort_comp)), x='mort_comp', y='std_MT_count', color='mort_comp', palette = 'jco', add = 'jitter', legend='none')
mort_plot<-mort_plot+ggtitle('8
mort_plot<-mort_plot+annotate('text', x=4, y=5, label='p-value < 0.007', fontface=2)#+stat_compare_means(method = 'anova', label.y =
3)+stat_compare_means(comparisons=my_comp_m, method = 't.test', label= 'p.format')#, label.y = 420)
mort_plot<-mort_plot+my_own_theme()+theme(legend.position='right', legend.title = element_text(size = 14, face = "bold"), panel.grid = element_blank())+xlab('Personality-
Mortality Indices')+ylab('Standardized mtDNA copy number')+labs(color="PMI")
mort_plot
ggsave(mort_plot, file="Pers_mort_Sardinia_final_std2.jpeg", width=7, height=7)

# t test of highest and lowest mortality risk groups
t.test(sard_morts$std_MT_count[which(sard_morts$mort_comp==0)], sard_morts$std_MT_count[which(sard_morts$mort_comp==1)])
t.test(sard_morts$std_MT_count[which(sard_morts$mort_comp==0)], sard_morts$std_MT_count[which(sard_morts$mort_comp==2)])
t.test(sard_morts$std_MT_count[which(sard_morts$mort_comp==0)], sard_morts$std_MT_count[which(sard_morts$mort_comp==3)])
t.test(sard_morts$std_MT_count[which(sard_morts$mort_comp==0)], sard_morts$std_MT_count[which(sard_morts$mort_comp==4)])

#Difference equivalence in years
#with no adjustments
summary(lm(Age~std_MT_count, data=wavedata1_plt))

#with adjustments
summary(lm(Age~no_age_resid_std, data=wavedata1_plt))

#for vu_sd
sard_traits$std_MT_count<-(sard_traits$MT_count-mean(sard_traits$MT_count, na.rm = T))/sd(sard_traits$MT_count, na.rm = T)

sard_traits$vu_sd<-factor(sard_traits$vu_sd, levels = sort(unique(sard_traits$vu_sd)))
my_comp<-list(c('LVHD', 'HVLD'), c('HVLD', 'HVHD'), c('HVLD', 'LVLD'))

vusd_plot<-ggboxplot(data=subset(sard_traits, !is.na(vu_sd)), x='vu_sd', y='std_MT_count', color='vu_sd', palette = 'jco', add = 'jitter', legend='none')
vusd_plot<-vusd_plot+ggtitle('8
vusd_plot<-vusd_plot+stat_compare_means(method = 'anova', label.y = 5)+stat_compare_means(comparisons=my_comp, method = 't.test', label= 'p.format')#, label.y = 420)
vusd_plot<-vusd_plot+my_own_theme()+theme(legend.position='none', panel.grid = element_blank())+xlab('Vulnerability and Self-discipline classes')+ylab('Standardized mtDNA
copy number')
vusd_plot
ggsave(vusd_plot, file="Vdmort_SardinIA_final_std.jpeg", width=6, height=6)

# t test of highest and lowest mortality risk groups (HVLD and LVHD)
t.test(sard_traits$std_MT_count[which(sard_traits$vu_sd=='HVLD')], sard_traits$std_MT_count[which(sard_traits$vu_sd=='LVHD')])

#=====  

# 4 Random effects meta analysis using library meta  

#=====  

#library used is meta, functions used are metagen and forest  

library(meta)
#CESD
meta_cesd_std<-metagen(TE=estimate, seTE = se, data = meta_analysis_final_std_plt[1:2,], studlab = paste(Study), comb.fixed = F, comb.random = T, hakn = F, prediction =
T, sm='SMD')
meta_cesd_std
forest(meta_cesd_std, layout = 'JAMA', text.predict = '95% PI', col.predict = 'black', xlab = "Effect size (95% CI)", colgap.forest = '1cm', colgap.studlab = '1cm')

meta_cesdc_std<-metagen(TE=estimate, seTE = se, data = meta_analysis_final_std_plt[3:6,], studlab = paste(Study), comb.fixed = F, comb.random = T, hakn = F, prediction =
T, sm='SMD')
meta_cesdc_std<-update.meta(meta_cesdc_std, byvar = Facet, comb.random = T, comb.fixed = F)
meta_cesdc_std
forest(meta_cesdc_std, layout = 'JAMA', text.predict = '95% PI', col.predict = 'black', xlab = "Effect size (95% CI)", colgap.forest = '1cm', colgap.studlab = '1cm')

#Personality Mortality Composite
meta_mort_std<-metagen(TE=estimate, seTE = se, data = meta_analysis_final_std_plt[7:8,], studlab = paste(Study), comb.fixed = F, comb.random = T, hakn = F, prediction =
T, sm='SMD')
meta_mort_std
forest(meta_mort_std, layout = 'JAMA', text.predict = '95% PI', col.predict = 'black', xlab = "Effect size (95% CI)", colgap.forest = '1cm', colgap.studlab = '1cm')

#agreeableness
metr_a_std<-metagen(TE=estimate, seTE = se, data = meta_analysis_final_std_plt[9:22,], studlab = paste(Study), comb.fixed = F, comb.random = T, hakn = F, prediction =
T, sm='SMD')
metr_a_std<-update.meta(metr_a_std, byvar = Facet, comb.random = T, comb.fixed = F)
metr_a_std
forest(metr_a_std, layout = 'JAMA', text.predict = '95% PI', col.predict = 'black', xlab = "Effect size (95% CI)", colgap.forest = '1cm', colgap.studlab = '1cm')

#conscientiousness
metr_c_std<-metagen(TE=estimate, seTE = se, data = meta_analysis_final_std_plt[23:36,], studlab = paste(Study), comb.fixed = F, comb.random = T, hakn = F, prediction =
T, sm='SMD')
metr_c_std<-update.meta(metr_c_std, byvar = Facet, comb.random = T, comb.fixed = F)
metr_c_std
forest(metr_c_std, layout = 'JAMA', text.predict = '95% PI', col.predict = 'black', xlab = "Effect size (95% CI)", colgap.forest = '2.5cm', colgap.studlab = '1cm')

#extraversion
metr_e_std<-metagen(TE=estimate, seTE = se, data = meta_analysis_final_std_plt[37:50,], studlab = paste(Study), comb.fixed = F, comb.random = T, hakn = F, prediction =
T, sm='SMD')
metr_e_std<-update.meta(metr_e_std, byvar = Facet, comb.random = T, comb.fixed = F)
metr_e_std
forest(metr_e_std, layout = 'JAMA', text.predict = '95% PI', col.predict = 'black', xlab = "Effect size (95% CI)", colgap.forest = '1cm', colgap.studlab = '1cm')

#neuroticism
metr_n_std<-metagen(TE=estimate, seTE = se, data = meta_analysis_final_std_plt[51:64,], studlab = paste(Study), comb.fixed = F, comb.random = T, hakn = F, prediction =
T, sm='SMD')
metr_n_std<-update.meta(metr_n_std, byvar = Facet, comb.random = T, comb.fixed = F)
metr_n_std
forest(metr_n_std, layout = 'JAMA', text.predict = '95% PI', col.predict = 'black', xlab = "Effect size (95% CI)",
colgap.forest = '1.5cm', colgap.studlab = '1cm', overall = F, overall.hetstat = F, prediction = F, fontfamily = 'sans',
fs.heading = 16, fs.xlab = 16, ff.xlab = 2, ff.study = 3, ff.heading = 2, spacing = 1.2, addrow.subgroups = T, col.by = 'black' )

#openness
metr_o_std<-metagen(TE=estimate, seTE = se, data = meta_analysis_final_std_plt[65:78,], studlab = paste(Study), comb.fixed = F, comb.random = T, hakn = F, prediction =
T, sm='SMD')

```

```

metr_og_std<-update.meta(metr_o_std,byvar = Facet,comb.random = T,comb.fixed = F)
metr_og_std
forest(metr_og_std,layout = 'JAMA',text.predict = '95% PI',col.predict = 'black',xlab = "Effect size (95% CI)",colgap.forest = '1.5cm',colgap.studlab = '1cm')

#####
# 5 Survival analysis
#####
#libraries used are 'survival' and 'survminer'.
#functions used are 'survfit' and 'ggsurvplot'

library("survival")
library("survminer")
#pmi
colnames(blsa_survival)[which(names(blsa_survival)=="mort_comp")]<- "PMI"
b.cph.pmi<-survfit(Surv(time,status)~PMI,data=blsa_survival)
ggsurvplot(b.cph.pmi,pval = T,conf.int = F,risk.table = F, risk.table.col='strata',
  linetype = 'strata',surv.median.line = 'hv',ggtheme = theme_bw(),
  palette = c("#EE799F", "#87CEEB", "#CDCD00", "#00868B", "#2E9FDF"),
  font.x=c(20, 'bold'), font.y=c(20, 'bold'), font.tickslab=c(18, 'bold'),
  font.legend=c(16, 'bold')
)

sard_cph$pmi<-as.factor(sard_cph$mort_comp)
sard_cph.pmi<-survfit(Surv(time,status)~pmi,data=sard_cph)
ggsurvplot(sard_cph.pmi,pval = T,conf.int = F,risk.table = F, risk.table.col='strata',
  linetype = 'strata',surv.median.line = 'hv',ggtheme = theme_bw(),
  palette = c("#EE799F", "#87CEEB", "#CDCD00", "#00868B", "#2E9FDF"),
)

#####
#6 Causal Mediation Analysis
#####
# lavaan package is used
# This package standardizes the estimates from the logistic and linear regressions
# before estimating the indirect effect so as to minimise the discrepancies
# between the a*b and c-c' estimates the method employed is described by
# Dawn Iacobucci (2012). Mediation analysis and categorical variables: The final frontier
# David P. MacKinnon and Matthew C. Cox (2012). Commentary on "Mediation Analysis and Categorical Variables:
# The Final Frontier" by Dawn Iacobucci
# The package uses structural equation modelling

library(lavaan)

####BLSA ####
model<- '
#Mediator
ave_mt_copy_number_30k ~ age + gender + a*mort_comp
#Mediator and predictor
deaths ~ age + gender + b*ave_mt_copy_number_30k + c*mort_comp

#indirect effect (a*b)
ie := a*b
#direct effect
de := c
#total effect
total := c + (a*b)
'
model.fit<-sem(model,data=blsa_neopir_final_pts,ordered = c('deaths'),
  se='bootstrap',bootstrap=5000,estimator='dwls')

summary(model.fit,fit.measures=T,rsquare=T,standardized=T)

####Sardinia ####
model2<- '
#Mediator
MT_count ~ Age + gender + a*mort_comp
#Mediator and predictor
deaths ~ Age + gender + b*MT_count + c*mort_comp

#indirect effect (a*b)
ie := a*b
#direct effect
de := c
#total effect
total := c + (a*b)
'
model2.fit<-sem(model2,data = wavedata1_plt,ordered = c('deaths'),
  se='bootstrap',bootstrap=5000,estimator='dwls')
summary(model2.fit,fit.measures=T,rsquare=T,standardized=T)

```
